# Supplementary material for: scMINER: a mutual information-based framework for identifying hidden drivers from single-cell omics data
Source: PubMed Central journal article supplement — bioRxiv. 2023 Jan 27:2023.01.26.523391. Preprint. [Version 1] doi: 10.1101/2023.01.26.523391 (PMC9901187; doi:10.1101/2023.01.26.523391), 2023-01-27
Supplement: NIHPP2023.01.26.523391v1-supplement-1.pdf [file NIHPP2023.01.26.523391v1-supplement-1.pdf]

## **Supplementary Information**

### **scMINER: a mutual information-based framework for identifying hidden drivers from single-cell omics data**

**Supplementary Figures 1-9.**

**Supplementary Tables 1-2.**

**Supplementary Note.**

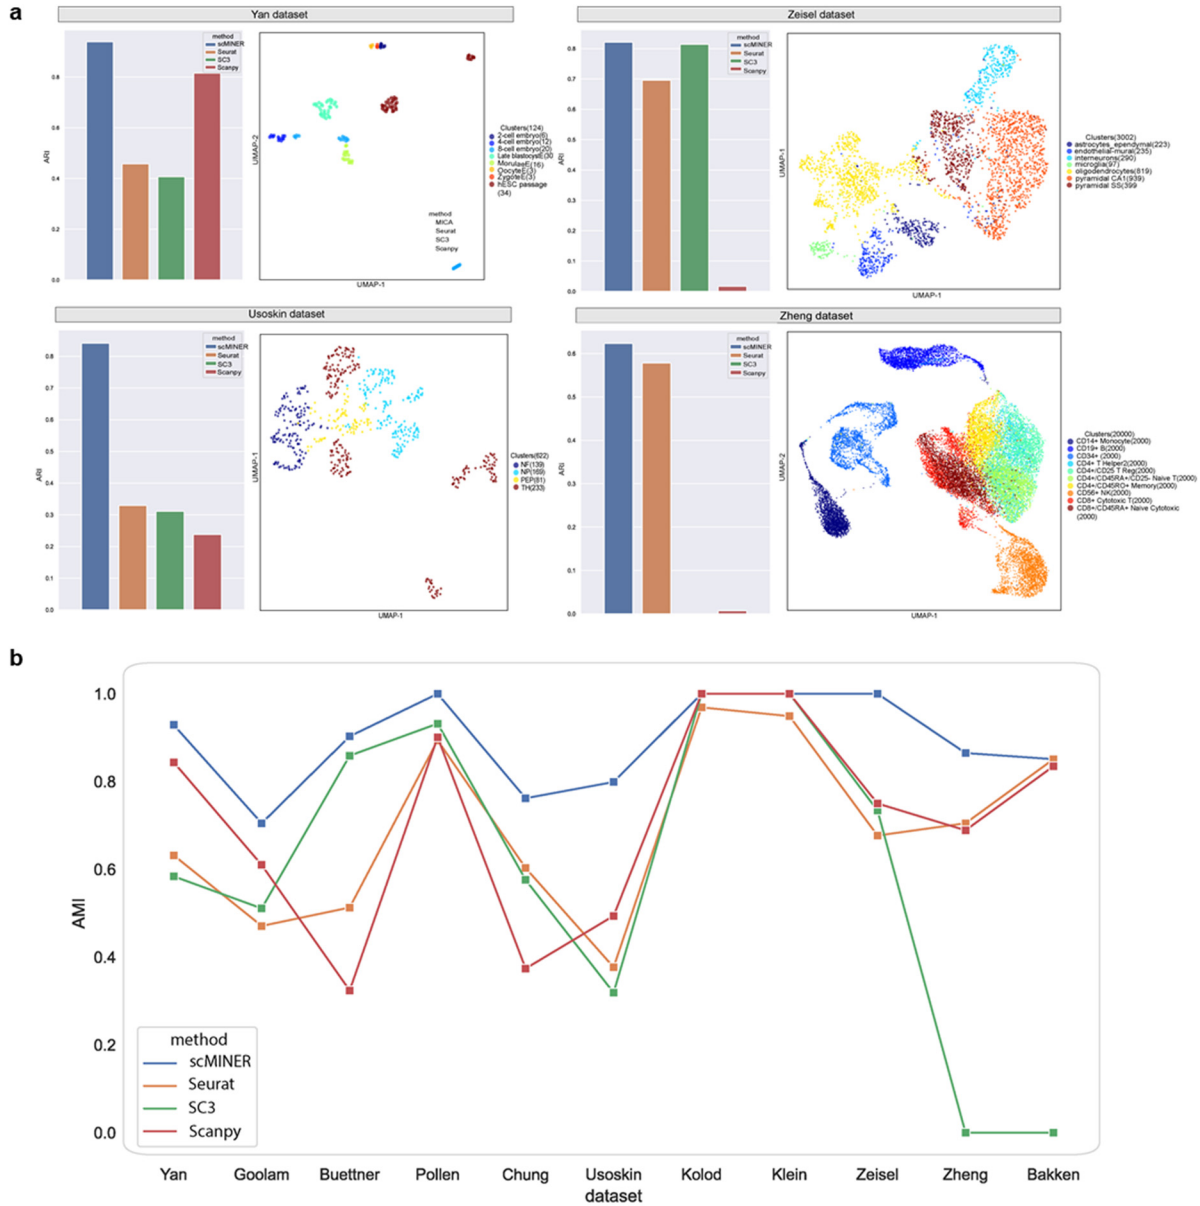

**Supplementary Figure 1. scMINER clustering performance evaluation using AMI and true label projection on four datasets.**

**a**, ARI bar plots and UMAP plots of scMINER clustering results annotated using true labels on Yan, Zeisel, Usoskin, and Zheng datasets. **b**, Clustering performance of scMINER, Seurat, SC3 and Scanpy measured by adjusted mutual information (AMI).

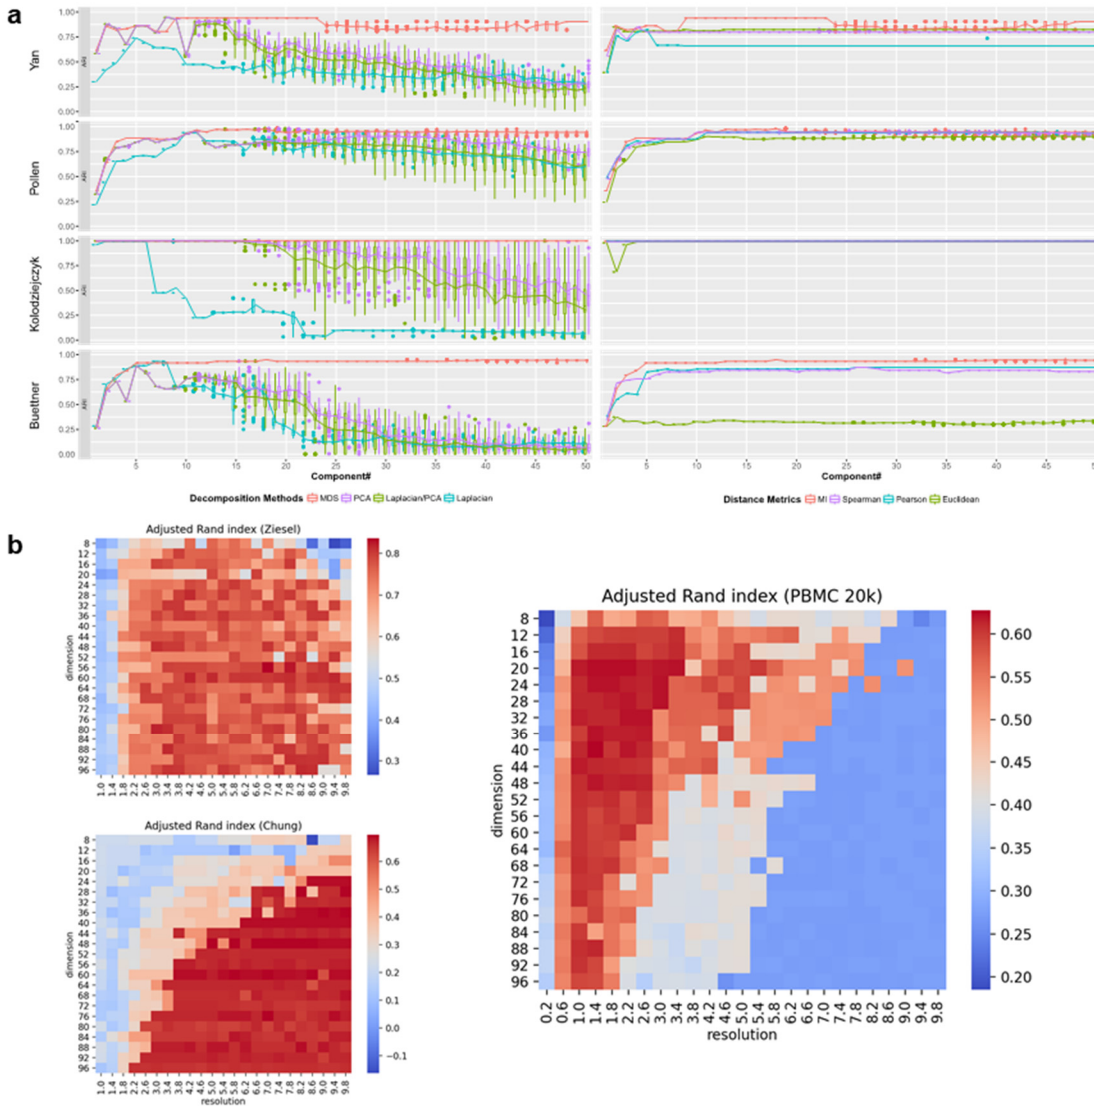

**Supplementary Figure 2. Effect of distance metrics and parameters on the clustering performance.**

**a**, Clustering performance comparison using four distance metrics (left) and four dimension reduction methods (right) on Yan, Pollen, Kolodziejczyk, and Buettner datasets. **b**, Clustering performance in term of ARI with respect to dimension and resolution parameters.

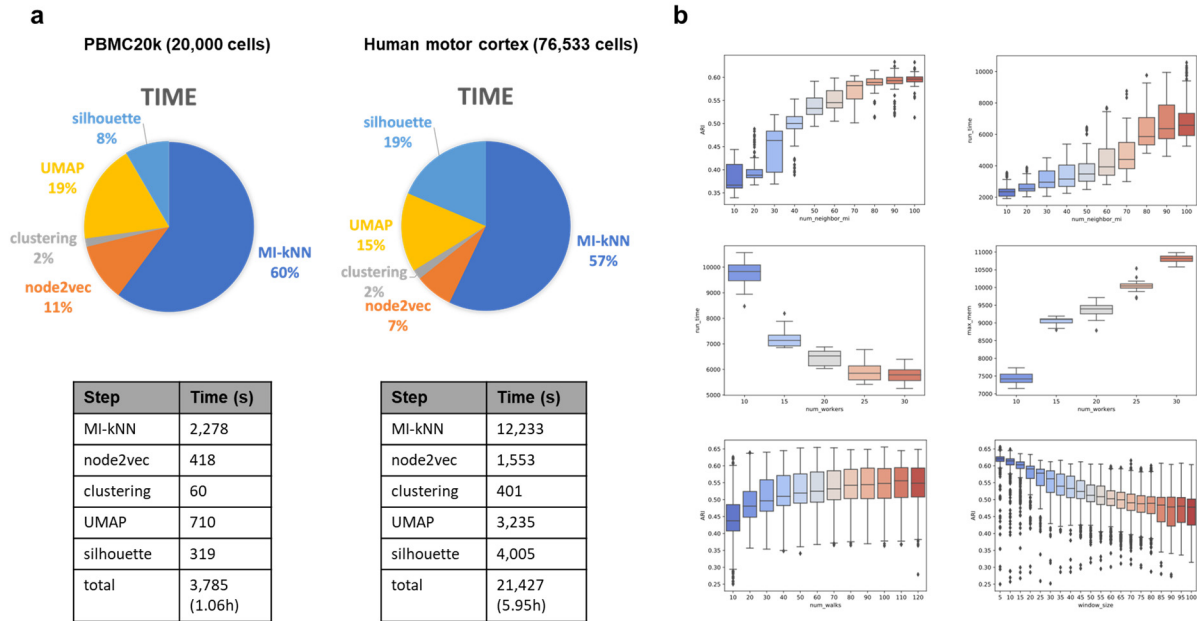

### Supplementary Figure 3. MICA computing resource usage analysis for PBMC (Zheng) and Human Motor Cortex (Bakken) datasets.

**a**, Run time for each step of MICA for PBMC20k and human motor cortex datasets using 25 cores. **b**, ARI, run time and memory consumption for PBMC with respect to some important parameters, e.g., number of workers, number of neighbors in building MI-kNN, and node2vec window size, etc.

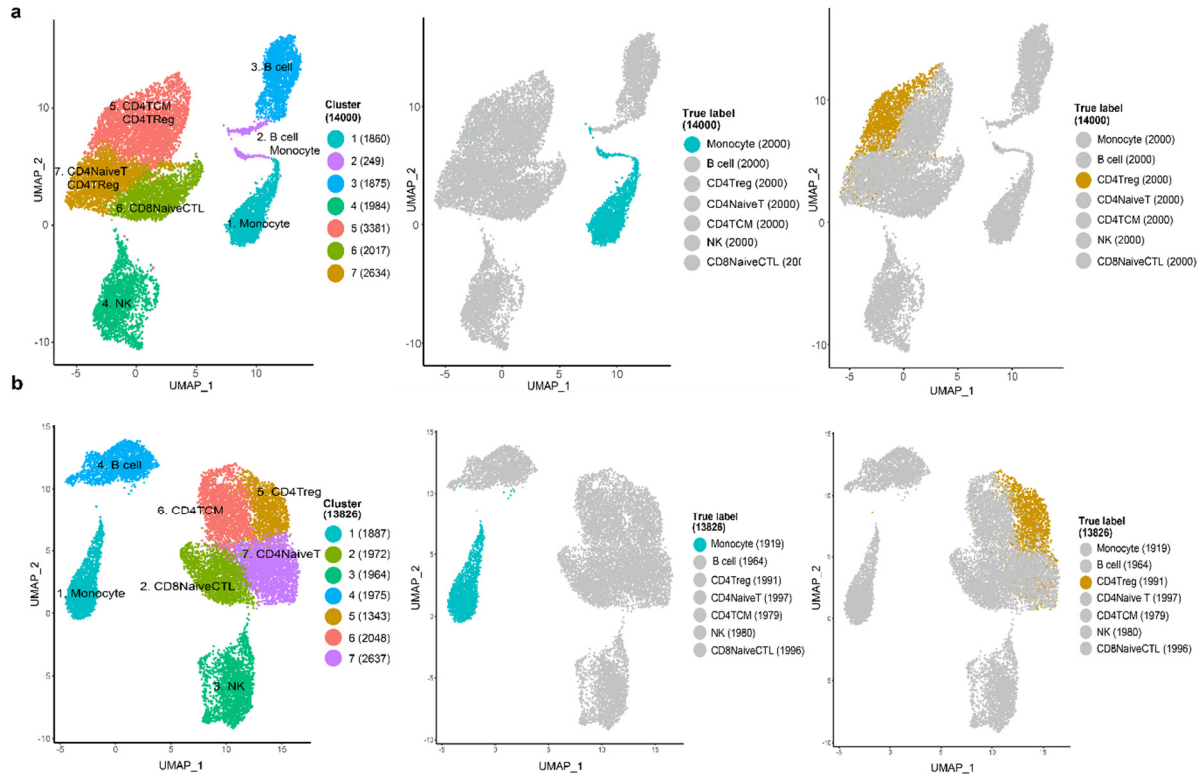

**Supplementary Figure 4. Effect of CP10K and CPM normalization on the clustering result of Zheng dataset.**

**a**, UMAP plots of all 7 clusters using count per 10K (CP10K) for normalization. **b**, UMAP plots of all 7 clusters using count per million (CPM) for normalization.

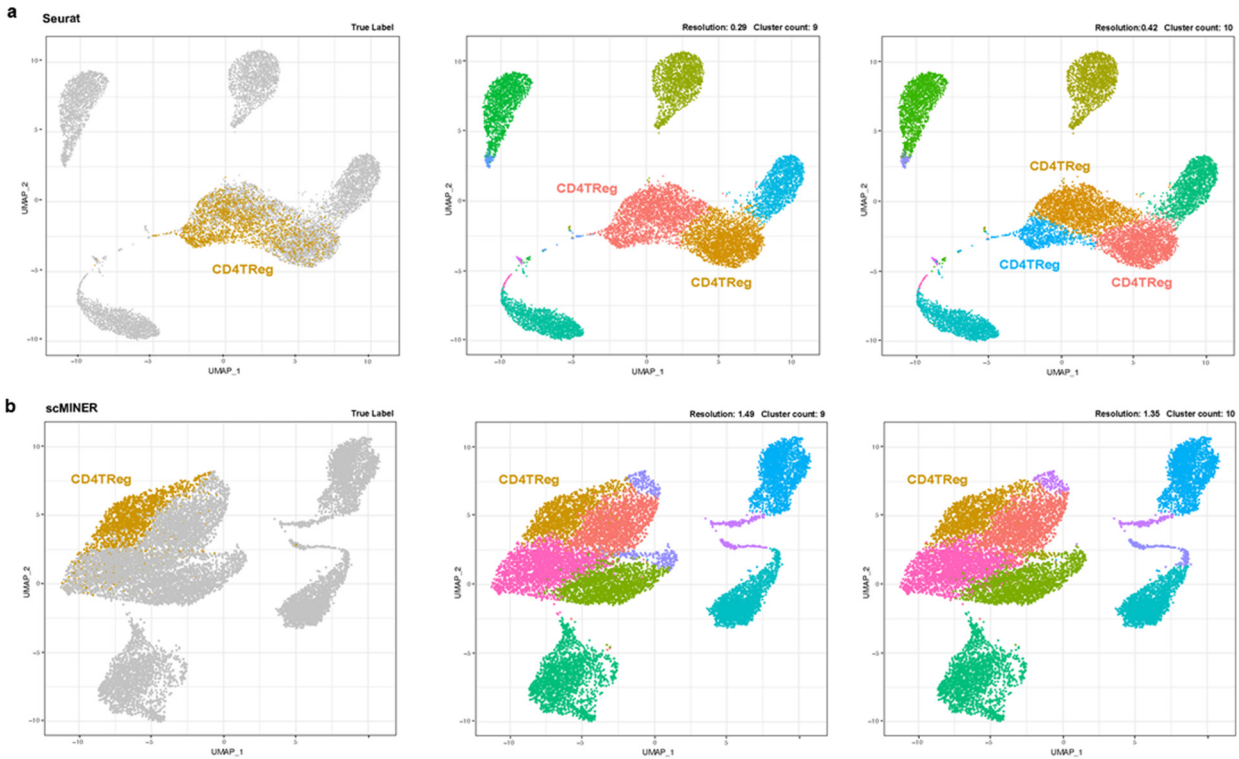

**Supplementary Figure 5. Comparison of scMINER and Seurat CD4Treg cell distribution on UMAPs with respect to the changing of clustering resolution.**

**a**, CD4Treg cell distribution on Seurat clusters with respect to the increasing number of resolution and cluster count. **b**, CD4Treg cell distribution on scMINER clusters with respect to the increasing number of resolution and cluster count.

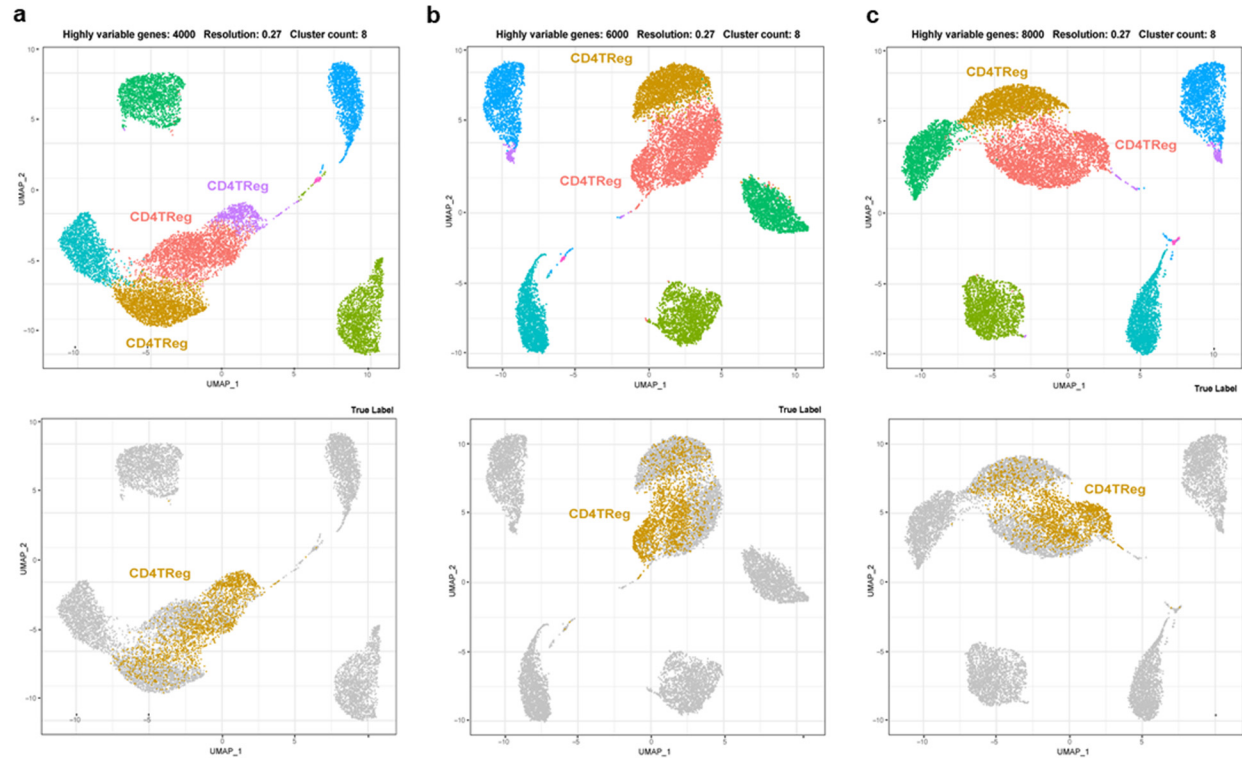

**Supplementary Figure 6. CD4Treg cell distribution on Seurat clusters with respect to the changing of the number of highly variable genes.**

**a-c**, CD4Treg cells are distributed in three Seurat clusters with 4,000 (a), 6,000 (b) and 8,000 (c) highly variable genes.

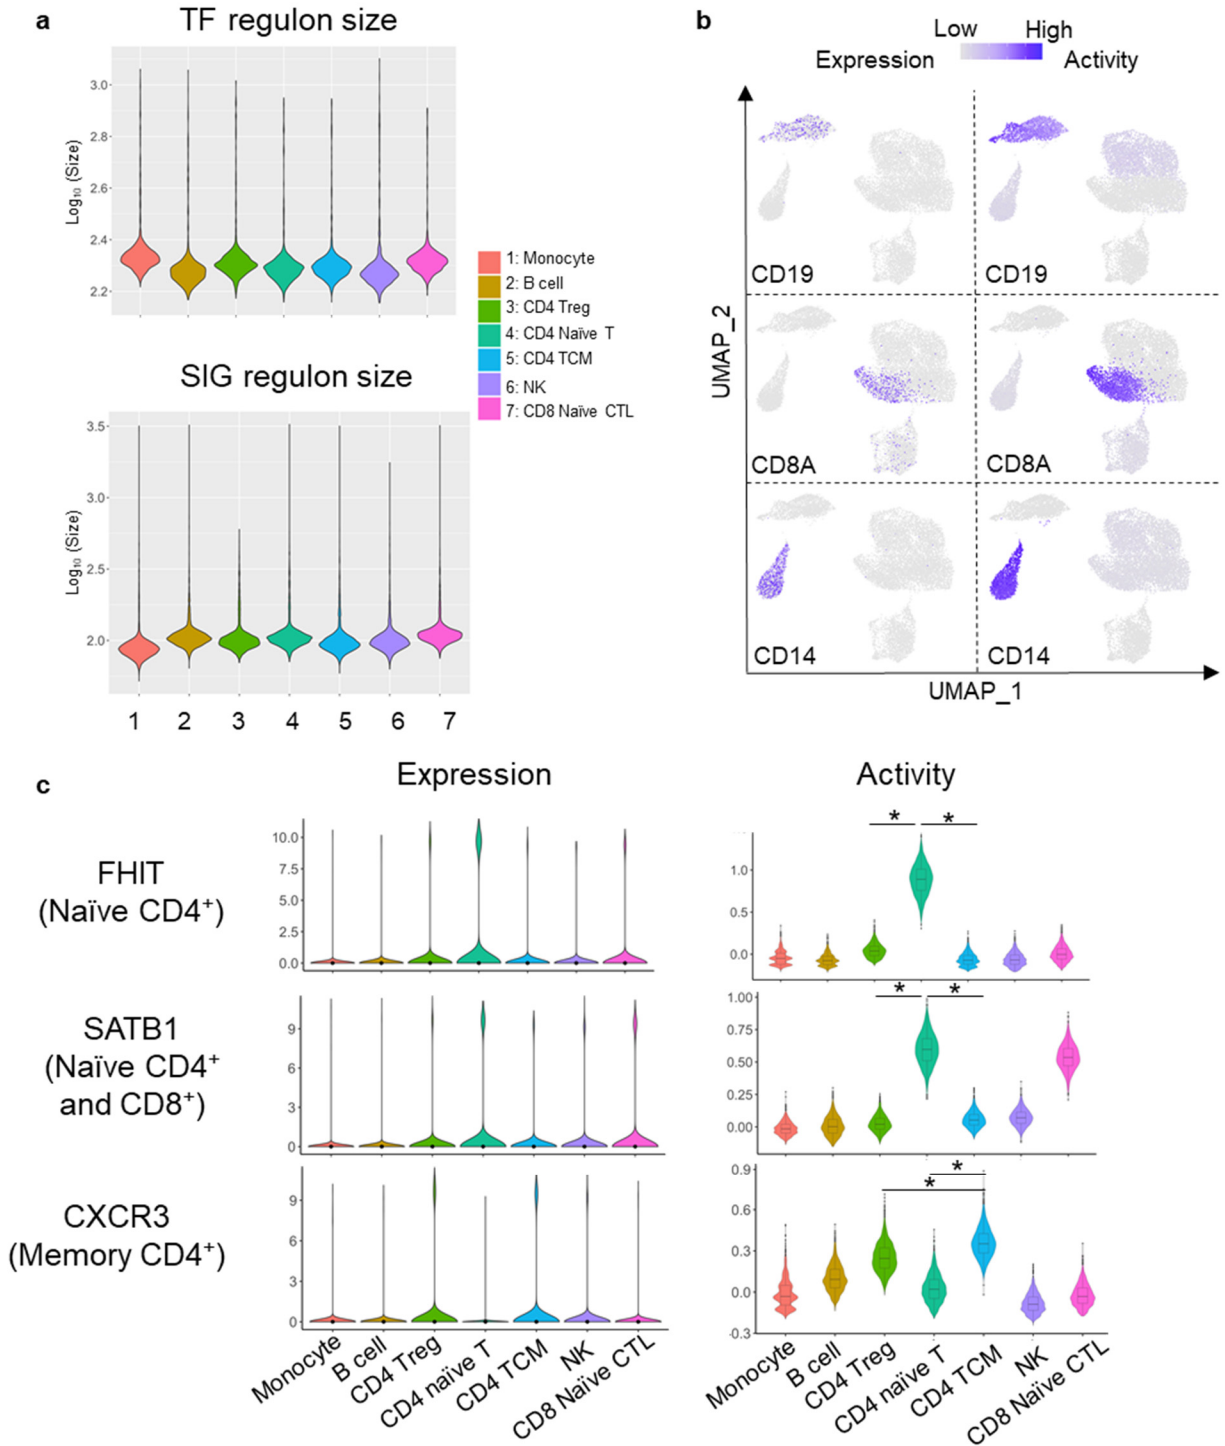

**Supplementary Figure 7. scMINER measures the activity of cell type-specific markers in PBMC.**

**a**, Mean TF and SIG regulon sizes in 7 sorted cell populations from PBMC scRNA-seq data. **b**, Expression and activity of CD19, CD8A and CD14 on UMAP using PBMC scRNA-seq data. **c**, Violin plot visualization of FHIT, SATB1 and CXCR3 expression and scMINER activity in 7 sorted cell populations from PBMC scRNA-seq data. \*,  $P < 2e-16$ .





**a**, Violin plot visualization of *Tbx21*, *Blimp1* and *Batf* expression and activity in 3 subsets of CD8<sup>+</sup> T cells. **b**, GRNs for Tpex cells, Teff-like cells and Tex cells. Key TFs shown in Fig. 5b for each CD8<sup>+</sup> T cell subset are highlighted in red. **c**, Violin plot visualization of *Mtor* and *Map4k1* expression and activity in 3 subsets of CD8<sup>+</sup> T cells. **d**, UMAP visualization of wild type and *Tox* deficient CD8<sup>+</sup> T cells in chronic infection (GSE119940). The numbers in the bracket indicates the cell numbers of each genotype. **e**, TF motif enrichment analysis for *Tox* deficient vs. wild-type CD8<sup>+</sup> T cells using an ATAC-seq dataset (GSE132986). BH FDR, the Benjamini-Hochberg false discovery rate. **f**, Functional pathway enrichment of a union of top 50 TFs and top 200 SIGs predicted by scMINER for wild type and *Tox* deficient CD8<sup>+</sup> T cells.

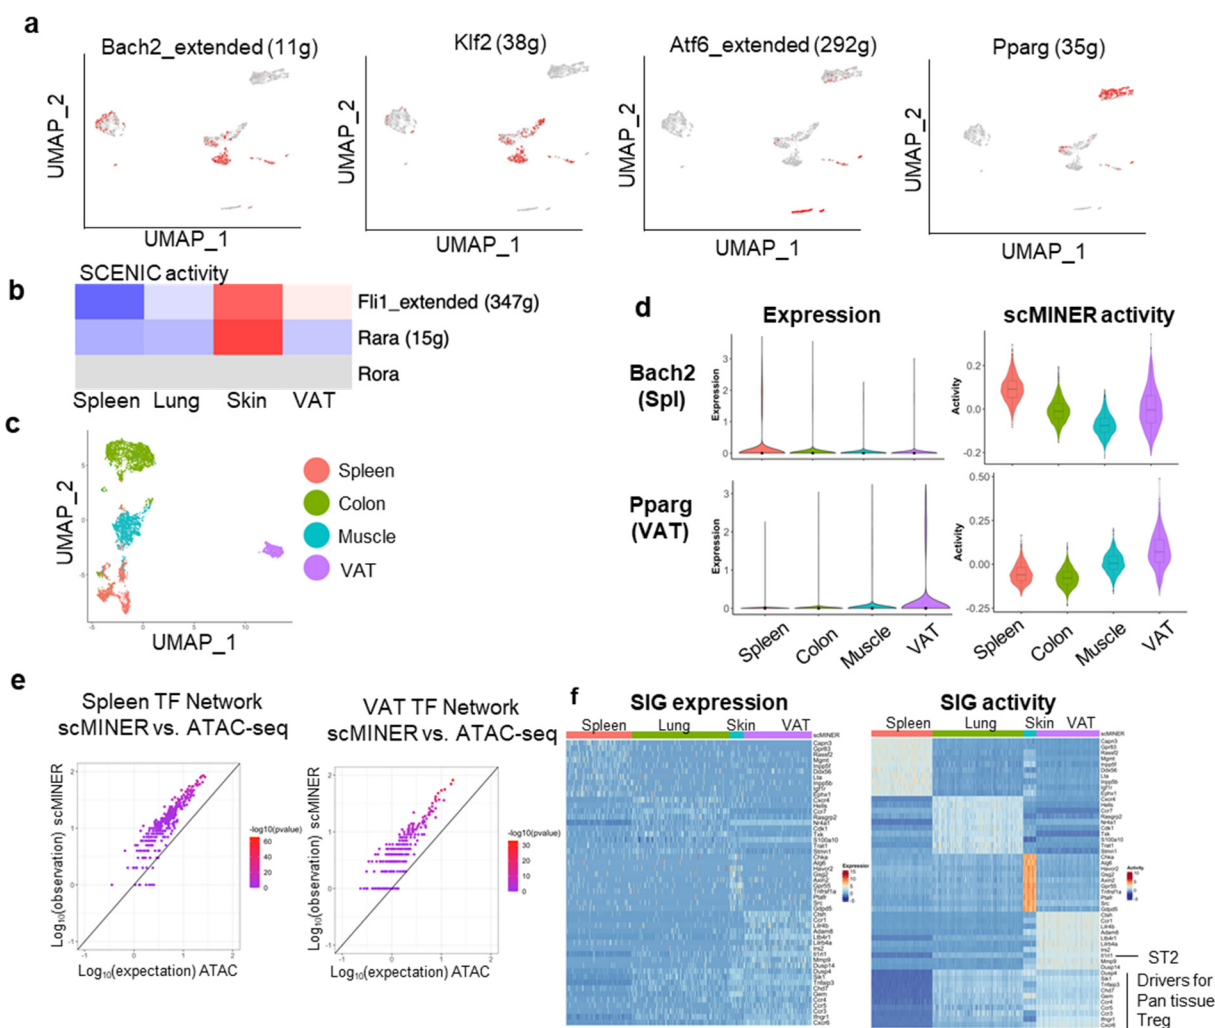

**Supplementary Figure 9. scMINER showed reproducibility in unravelling drivers in tissue specific Treg cells from different datasets.**

**a**, UMAP visualization of SCENIC binary activity of *Bach2*, *Klf2*, *Atf6* and *Pparg*. **b**, Heatmap of average SCENIC activity of *FLI1*, *RARA* and *RORA* in Treg cells from each tissue. Grey indicates that the TF activity could not be predicted by SCENIC. **c**, MICA MDS clustering of mouse *Foxp3*<sup>+</sup> regulatory CD4<sup>+</sup> T cells (GSE109742) isolated from spleen, colon, muscle and visceral adipose tissue (VAT). **d**, Violin plot visualization of *Bach2* and *Pparg* expression and scMINER activity in spleen, colon, muscle and VAT Treg cells from GSE109742. **e**, Similarity of TF regulon in spleen and VAT Treg cells (GSE109742) generated by SJARACNe and footprint genes detected by ATAC-seq data (GSE112731) in corresponding tissues. Expected number of genes in intersection of ATAC-seq footprints as reference ( $\log_{10}$  scale, x axis) with regard to hypergeometric distribution vs. observed intersection ( $\log_{10}$  scale, y axis). For all genes, the observed intersection is significantly higher than expectation (black line). The color of the dots represents the  $-\log_{10}$  (P-value) according to Fisher's exact test. **f**, Heatmap visualization of SIG expression in each cell clustered by mouse *Foxp3*<sup>+</sup> regulatory CD4<sup>+</sup> T cells isolated from

spleen, lung, skin and VAT. Drivers for Pan tissue Treg, drivers that have higher activity in Treg cells from the lung, skin and VAT than from spleen.

**Supplementary Table 1. Summary of 11 single-cell datasets used for the evaluation of clustering methods.**

| Dataset                     | Protocol     | Size   | Class | Taxonomy | Tissue              | Accession ID |
|-----------------------------|--------------|--------|-------|----------|---------------------|--------------|
| Yan (2013) <sup>1</sup>     | Tang         | 124    | 8     | Human    | Embryonic stem      | GSE36552     |
| Goolam (2016) <sup>2</sup>  | Smart-Seq2   | 124    | 5     | Mouse    | Development         | E-MTAB-3321  |
| Buettner                    | C1           | 182    | 3     | Mouse    | Embryonic stem      | E-MTAB-2805  |
| Pollen (2014) <sup>4</sup>  | SMARTer      | 301    | 11    | Human    | Cerebral cortex     | SRP041736    |
| Chung (2017) <sup>5</sup>   | SMARTer      | 515    | 5     | Human    | Breast cancer       | GSE75688     |
| Usoskin (2015) <sup>6</sup> | STRT-seq     | 622    | 4     | Mouse    | Sensory neurons     | GSE59739     |
| Kolod (2015) <sup>7</sup>   | SMARTer      | 704    | 3     | Mouse    | Embryonic stem      | E-MTAB-2600  |
| Klein (2015) <sup>8</sup>   | inDrop       | 2,717  | 4     | Mouse    | Embryonic Stem      | GSE65525     |
| Zeisel (2015) <sup>9</sup>  | STRT-seq     | 3,005  | 7     | Mouse    | Cortex, hippocampus | GSE60361     |
| Zheng (2017) <sup>10</sup>  | 10x Genomics | 20,000 | 10    | Human    | Sorted peripheral   | SRP073767    |
| Bakken (2020) <sup>11</sup> | 10x Genomics | 76,533 | 20    | Human    | Motor cortex        | Azimuth      |

**Supplementary Table 2. Summary of scRNA-seq and ATAC-seq datasets used for scMINER applications.**

| Accession ID | Data type  | Cell types                                                                             | Protocol     |
|--------------|------------|----------------------------------------------------------------------------------------|--------------|
| GSE122712    | scRNA-seq  | CD8 <sup>+</sup> T cells from chronic infection <sup>12</sup>                          | 10x Genomics |
| GSE130879    | scRNA-seq  | Tissue (spleen, lung, skin, and VAT) Treg cells <sup>13</sup>                          | 10x Genomics |
| GSE130879    | scRNA-seq  | Tissue Treg precursors <sup>13</sup>                                                   | 10x Genomics |
| GSE109742    | scRNA-seq  | Tissue (spleen, colon, muscle, and VAT) Treg cells <sup>14</sup>                       | InDrop       |
| GSE119940    | scRNA-seq  | CD8 <sup>+</sup> T cells from WT and Tox KO in chronic infection (day 7) <sup>15</sup> | 10x Genomics |
| GSE123236    | ATAC-seq   | Tpex and Tex in LCMV infection <sup>12</sup>                                           | Bulk         |
| GSE132986    | ATAC-seq   | WT and Tox KO CD8 <sup>+</sup> T cells <sup>16</sup>                                   | Bulk         |
| GSE112731    | ATAC-seq   | Tissue (spleen and VAT) Treg cells <sup>14</sup>                                       | Bulk         |
| GSE156112    | scATAC-seq | Tissue (spleen, lung, skin, and VAT) Treg cells <sup>17</sup>                          | 10x Genomics |

**Supplementary Note: Comprehensive scMINER documentation and tutorial with examples is publicly accessible via <https://jvyulab.github.io/scMINER>.**

## References

1. Yan, L. et al. Single-cell RNA-Seq profiling of human preimplantation embryos and embryonic stem cells. *Nature Structural & Molecular Biology* **20**, 1131-1139 (2013).
2. Goolam, M. et al. Heterogeneity in Oct4 and Sox2 Targets Biases Cell Fate in 4-Cell Mouse Embryos. *Cell* **165**, 61-74 (2016).
3. Buettner, F. et al. Computational analysis of cell-to-cell heterogeneity in single-cell RNA-sequencing data reveals hidden subpopulations of cells. *Nature Biotechnology* **33**, 155-160 (2015).
4. Pollen, A.A. et al. Low-coverage single-cell mRNA sequencing reveals cellular heterogeneity and activated signaling pathways in developing cerebral cortex. *Nature Biotechnology* **32**, 1053-1058 (2014).
5. Chung, W. et al. Single-cell RNA-seq enables comprehensive tumour and immune cell profiling in primary breast cancer. *Nature communications* **8**, 15081 (2017).
6. Usoskin, D. et al. Unbiased classification of sensory neuron types by large-scale single-cell RNA sequencing. *Nature Neuroscience* **18**, 145-153 (2015).
7. Kolodziejczyk, Aleksandra A. et al. Single Cell RNA-Sequencing of Pluripotent States Unlocks Modular Transcriptional Variation. *Cell stem cell* **17**, 471-485 (2015).
8. Klein, Allon M. et al. Droplet Barcoding for Single-Cell Transcriptomics Applied to Embryonic Stem Cells. *Cell* **161**, 1187-1201 (2015).
9. Zeisel, A. et al. Cell types in the mouse cortex and hippocampus revealed by single-cell RNA-seq. *Science* **347**, 1138-1142 (2015).
10. Zheng, G.X.Y. et al. Massively parallel digital transcriptional profiling of single cells. *Nature communications* **8**, 14049 (2017).
11. Bakken, T.E. et al. Comparative cellular analysis of motor cortex in human, marmoset and mouse. *Nature* **598**, 111-119 (2021).
12. Miller, B.C. et al. Subsets of exhausted CD8<sup>+</sup> T cells differentially mediate tumor control and respond to checkpoint blockade. *Nat Immunol* **20**, 326-336 (2019).
13. Delacher, M. et al. Precursors for Nonlymphoid-Tissue Treg Cells Reside in Secondary Lymphoid Organs and Are Programmed by the Transcription Factor BATF. *Immunity* **52**, 295-312 e211 (2020).
14. DiSpirito, J.R. et al. Molecular diversification of regulatory T cells in nonlymphoid tissues. *Sci Immunol* **3** (2018).
15. Yao, C. et al. Single-cell RNA-seq reveals TOX as a key regulator of CD8<sup>+</sup> T cell persistence in chronic infection. *Nat Immunol* **20**, 890-901 (2019).
16. Khan, O. et al. TOX transcriptionally and epigenetically programs CD8<sup>+</sup> T cell exhaustion. *Nature* **571**, 211-218 (2019).
17. Delacher, M. et al. Single-cell chromatin accessibility landscape identifies tissue repair program in human regulatory T cells. *Immunity* **54**, 702-720 e717 (2021).
